# Supplementary material for: Rapid Eye Movement Sleep Behavior Disorder Symptoms Correlate with Domains of Cognitive Impairment in Parkinson's Disease
Source: PubMed Central journal article supplement — Chin Med J (Engl). 2016 Feb 20;129(4):379–85. doi: 10.4103/0366-6999.176077 (PMC4800836; doi:10.4103/0366-6999.176077), 2016-02-20
Supplement: CMJ-129-379_Suppl1.pdf [file CMJ-129-379_Suppl1.pdf]

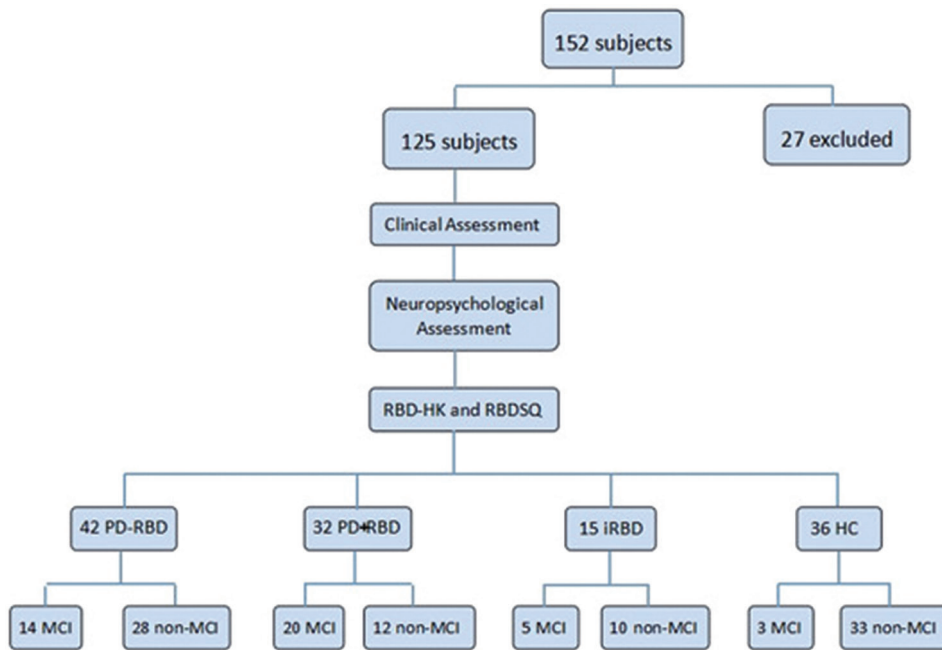

**Supplementary Material 1:** Flowchart of this study. RBDQ-HK: Rapid eye movement sleep behavior disorder Questionnaire-Hong Kong; RBDSQ: Rapid eye movement sleep behavior disorder Screening Questionnaire; PD–RBD: Parkinson’s disease patients without rapid eye movement sleep behavior disorder; PD+RBD: Parkinson’s disease patients with rapid eye movement sleep behavior disorder; iRBD: Idiopathic rapid eye movement sleep behavior disorder; HC: Healthy controls; MCI: Mild cognitive impairment.
